# Supplementary material for: Eupatilin Exerts Antinociceptive and Chondroprotective Properties in a Rat Model of Osteoarthritis by Downregulating Oxidative Damage and Catabolic Activity in Chondrocytes
Source: PubMed Central journal article supplement (PMC4471346; doi:10.1371/journal.pone.0130882), 2015-06-17

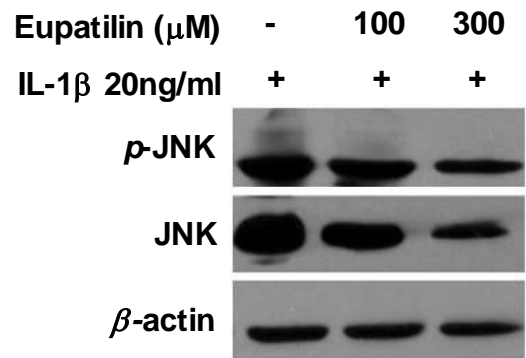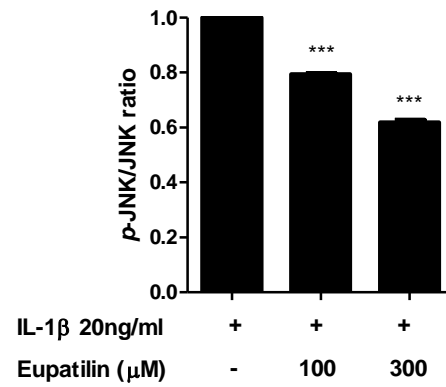

Supplement: pone.0130882.s001.pdf [file pone.0130882.s001.pdf]
